# Supplementary material
Source: publisher figshare collection journal article supplement (https://gsajournals.figshare.com/ndownloader/files/18714644)
Supplement: Supplementary file 1 [file 18714644]

## Sheet: Sheet1
GeneID	Fprimer	Rprimer	AmpSize	FpTm	RpTm	Description
PGSC0003DMG400028177	TGCTGTTCACAAGTGTAACATG	GCACCAAGAAGAATAGCATCAG	150	58.03	58.03	Pyruvate kinase
PGSC0003DMG400006276	GATGCGGTAGATTACTCTGTCA	CTTTTGGAACATTTTTGCGGTC	172	58.01	58.12	basic secretory protein
PGSC0003DMG400011398	AGAGCAAGAAGTGATAAAGCCT	AACTTGTAACCATGCCACTCTA	178	58.03	57.96	HSP20-like chaperone
PGSC0003DMG400005844	CCATTGTTGTTTTAGGCCAAGA	CACTGAATTGGTAGAAAGATGACTG	112	57.99	58.52	Development/cell death domain protein
PGSC0003DMG400008954	TTATGCAGCAGAGCTTCATCTA	CCTTGCTAGCTCATTCAGTTTG	133	57.91	58.23	Carbonic anhydrase
PGSC0003DMG400017187	CACATCGGATTTGAATTACCCC	TGCTGCCGAAGATGAATAAAAG	100	58.01	57.96	HR-like lesion-inducer
PGSC0003DMG400003043	TTTCTCCCTTCTTGCTTTTGTG	CATGTTTGGCCCTTATTGAGAC	132	57.93	58.21	Thaumatin
PGSC0003DMG400017535	TCTGTATTCCTTCAGCTAACGG	CTAACTTCCATACCTGAGGACG	199	58.2	58.27	Transcription factor MYC
PGSC0003DMG400023340	ATATTGACACATTCGCTTGAGC	GTTGCTCCTCATATGGTCCATA	220	58.03	57.97	Ribophorin I
PGSC0003DMG400010224	CAAAAAGTTTGCAAGACCGAAC	GATTCAGGCTAGGGTAACAACT	190	58.07	58.11	Cysteine peptidase
EIF-3e	GGAGCACAGGAGAAGATGAAGGAG	CGTTGGTGAATGCGGCAGTAGG	164	60	60	Internal reference gene
